# Supplementary material for: Effect of disdrometer sampling area and time on the precision of precipitation rate measurement
Source: Copernicus journal article supplement (doi:10.5194/amt-2020-393), 2020-10-17
Supplement: Supplementary file [file amt-2020-393-AC1-supplement.pdf]

Manuscript Number: 10.5194/amt-2020-393

Effect of disdrometer sampling area and time on the precision of precipitation rate measurement

by Karlie Rees and Timothy J. Garrett

Summary:

Stochastic simulations are used to determine the precision of rain detection and the uncertainty affecting rain rate estimates from a new precipitation sensor - the Differential Emissivity Imaging Disdrometer (DEID) - as a function of disdrometer collection area.

Overall assessment:

The sensor presented in this paper is definitively interesting and the problem of determining the minimum sampling surface needed to achieve a given level of accuracy on rainfall estimates is clearly relevant. However, I have serious doubts about the soundness of the results and conclusions drawn by the authors. My main point of criticism concerns the methodology used by the authors, which neglects many other major sources of errors and uncertainties in rainfall measurements and, in my opinion, is far too idealized to draw robust conclusions. My recommendation would be to extend the current work by taking into account wind + instrumental limitations as well. Also, I think the structure of the paper needs to be improved, with better literature review, more detailed and consistent description of the methods, and more in-depth analysis/discussion of results.

Recommendation: Major review

Major Comments:

- Introduction: instead of giving a lot of technical details about how rainfall sensors work, and which theoretical performances are advertised by the manufacturers, you could cite more in-depth scientific studies about true measurement uncertainties for different types of sensors, sampling areas and types of rainfall. For example, there are plenty of relevant studies that have looked at uncertainties affecting rain rate measurements using co-located gauges and disdrometers. Similarly, there are numerous papers where stochastic simulators are used to generate large numbers of theoretical drop size distributions for studying sampling uncertainties.

**Added the following to the introduction II.22**

**In instrument development, striking a balance between sampling area size and accurate fine-scale precipitation detection is a well-known problem. Among other instrument-specific considerations, disdrometer accuracy depends on the sampling area and time interval. Gultepe (2008) highlights a universal difficulty in accurately measuring very light precipitation. In their study, they compared different co-located precipitation sensors and found large absolute and relative errors (32-44%) for all instruments when**

precipitation rate  $R < 0.3$  mm/h, but the relative errors were approximately 10% when  $R > 1.5$  mm/h. Despite these observations, they found that optical and hotplate disdrometers can more accurately detect light precipitation compared to weighing gauges, despite having comparatively small sampling areas, typically  $50\text{ cm}^2$ , where the VRG101 weighing gauge sampling area is  $400\text{ cm}^2$ . Here, we focus solely on the effect of disdrometer sampling area and time interval on the precision of precipitation rate measurement distinct from any other uncertainties associated with the instruments themselves.

Methodology: Annex 1A of the WMO 2018 report on operational measurement uncertainty requirements clearly states that uncertainties for liquid precipitation are seriously affected by wind. Your simulation study completely neglects this aspect. Similarly, the effect of instrumental limitations (e.g., border or edge effects, and software/hardware limitations) are ignored. All these are rather well documented in the literature and could have been (partially) incorporated into the simulation study. The problem is that by ignoring wind and instrumental limitations, you are severely underestimating the true uncertainty affecting the measurements and, as a result, overestimating the sensitivity to the choice of the sampling surface. For heavy rain events for example, which are often associated with higher wind speeds, the size of the sampling area might only play a minor role compared to the magnitude of wind-induced errors ( $>10\%$ ). This is quite important as wind-induced uncertainties will be there regardless of the used sampling area. I get that this is not the focus of your paper. Still, I think that by ignoring these effects, your conclusions become very questionable from a scientific point of view.

**The original intent of our paper was to determine the relationship between sampling area, time, and precipitation rate for the purposes of designing the DEID. DEID measurements have been found to be negligibly affected by winds (Singh et al, now referenced). Unlike other instruments that presumably are being referred to in the comment, the DEID is not expected to be greatly affected by catchment efficiency issues given it is simply an upward facing surface, as is the ground. What is notably different is of course the surface area, which is why we focus on this aspect of the problem.**

- Description of DEID: It is not clear to me how the drop diameters are inferred from the DEID. In Section 3, ll 107-108 you mention that “the value of  $\Delta D=0.25\text{mm}$  was chosen to approximate the spatial measurement resolution of the prototype DEID.” This is the first time this binning parameter is mentioned in the paper. Section 2, which is supposed to contain the description of DEID and its working principle does not mention anything about this. Please elaborate and add more details about how you actually calculate your quantities based on the DEID measurements.

**Section 2 now includes the statement:**

**For the study described here, the DEID's aluminum plate had an area of  $15.24\text{ cm} \times 15.24\text{ cm}$  and the camera pixel resolution was  $0.2\text{ mm}$**

- The DEID is a new rainfall sensor. The reference paper (Singh et al., pending) is not published yet and it would be nice to show at least a picture of the instrument to help the reader better understand the technical specifications provided in Section 2.

**A photo of the DEID has been added to Section 2.**

- Methodology: Section 3.1 introduces the simulation approach which is based on Exponential distributions. But later, in section 3.3, we learn that actually, you used gamma DSD. Please clarify this apparent inconsistency. My advice would be to rewrite the entire methodology section using only gamma distributions (which are more common in modern studies).

**We begin with a Marshall-Palmer distribution in section 3.1 for purposes of simplicity. In line 150 we state that the contribution to the precipitation rate from small precipitation drops is small and that in reality, and in this study, drops tend to follow a gamma distribution.**

**In general small drops contribute negligibly to calculations of precipitation rate (Smith , 2003) but due to their higher concentrations they may nonetheless be the first detected. Accordingly, the functional form of  $n(D)$  is adjusted from the more simple exponential form described by Eq. (3) to a gamma distribution**

- Compared with the other sections, the Results section is very brief. There's hardly any discussion about the consequences of this work and how it could be used to improve the accuracy of disdrometers. For example, for the Parsivel2, the effective sampling area is about 50 cm<sup>2</sup>, which, according to your results, would not be large enough for higher rain rates. Yet often, people operate these sensors at 1 min resolution (or even 30s) with intensities ranging up to >50 mm/h. How large would the relative errors be in this case and how feasible are the guidelines of WMO?

**It is stated in line 38 that very few commercial instruments follow WMO guidelines. In the conclusions we now state**

**The results presented here have general implications for the sampling limitations of other widely used particle-by-particle distrometers such as the PARSIVEL with a sample area of 48.6 cm<sup>2</sup> or effective W of 7 cm (Battaglia 2010), and the 2DVD (Kruger 2002) with W = 10 cm. Despite their sizable collection areas, like the DEID, they may nonetheless fail to meet WMO standards if operated at a nominal 1 minute sampling interval.**

- Rainfall rates are important. But for remote sensing, other weighted moments of the DSD are equally important. For reflectivity, which is a higher-order moment, I assume that even larger surfaces are necessary. Instead of focusing solely on rain rates, the paper could benefit from additional analyses and simulations looking at other moments and relevant parameters.

**Higher order moments other than rainrates are not the focus of this paper. Moments such as reflectivity are not as relevant to this study because the ensemble sample volume of radar is much greater than the sample volume in this study.**

- Application to DEID measurements (section 4.2): This part is the most interesting scientifically speaking because you actually try to compare your calculations to real data. But honestly, it's very hard to follow and I did not understand it. There are too many missing details/explanations in the text. How many cases did you look at? How did you select your examples? and what type of rain events do they correspond to? To me, it seems like you're basing your conclusions on the superficial analysis of only two 1-min samples. There is hardly any discussion/analysis that puts these results in a larger perspective over many different events. Finally, I find it worrying that you can't really explain the differences you see between the theoretical confidence intervals and the observations. It makes me wonder whether other important factors were at play (e.g., wind, instrumental limitations or biases in the DEID measurements). Most importantly, it makes me question the reliability of the simulation studies in the first place.

**Added details about the events, how the samples were selected, and rain type as follows**

During a field campaign that took place at the University of Utah between April 2019 and March 2020, the DEID recorded the mass and density of individual hydrometeors, along with the one-minute-averaged precipitation rate  $R_{\text{DEID}}$  for six rain events and five snow events with data spanning 1185 total minutes. DEID particle mass distributions for two contrasting one-minute samples of convective moderate ( $R_{\text{DEID}} = 4.2$  mm/h) and light ( $R_{\text{DEID}} = 0.1$  mm/h) rain are shown in Fig. 5 and 6. These samples were selected from rain-only events with measured  $R_{\text{DEID}}$  values closest to the values of  $R$  that were analyzed in Section 4.1.

**Some analysis of non-Poissonian clustering was performed on DEID datasets. Discussion is added about non-Poissonian clustering of precipitation contributing to the discrepancy between DEID measurements and our simulation. The following was added to II194-203**

One possibility is that the raindrop interarrival time and spacing were not in fact Poissonian (Jameson and Kostinski, 2001b). In the event of clustering then a larger plate would be required to provide an accurate assessment of the average rain rate during a given time interval.

To assess whether this is the case, two-point correlation functions  $\eta$  were calculated following Shaw et al. (2002). A value of unity indicates interarrival times that are Poissonian and values greater than unity the presence of non-random clustering. Based on the location of hydrometeor centroids as they arrive on the DEID plate, storm-averaged values of  $\eta$  were found to be equal to 1.01 for rain falling under light winds on March 8, 2020, between 13:38 and 15:49 MST, and equal to 1.10 for the period between 05:00-07:34 MST earlier that day when high winds were present. For contrast, the value of  $\eta$  was 1.55 for a snow event with large aggregate snowflakes that took place on January 14, 2020 at 12:43-14:06 MST. While more extensive analysis is required, the implication is that non-Poissonian clustering can occur.

**The following was added to the abstract II.9**

**The field results suggest an even larger plate may be required to meet the stated accuracy, likely in part due to non-Poissonian hydrometeor clustering.**

Technical comments:

- Title: You could make the title more specific and more aligned with the actual content of the paper by adding the keywords “idealized simulation study” or “Differential Emissivity Imaging Disdrometer”. Yes, the approach itself is quite general, but your results are heavily focused on the DEID. The current title does not reflect this and should be changed.

**The title is now**

**Idealized simulation study of the relationship of disdrometer sampling statistics to the precision of precipitation rate measurement**

- II.59-66: this paragraph could be moved from the Introduction to section 2 and merged together with the text describing the DEID. More generally, I suggest to move most of the technical parts about the DEID to section 2 and restructure the introduction to address more relevant issues related to sampling surfaces in optical/video disdrometers and pros/cons of using small/large measurement surfaces.

**Most of the detailed DEID introduction has been moved to section 2. Pros and cons of the size of the DEID have been clarified in the introduction as follows:**

**A newer hotplate disdrometer, yet to be commercialized, is the Differential Emissivity Imaging Disdrometer (DEID) developed at the University of Utah. The DEID measures the mass of individual hydrometeors using a hotplate and a thermal camera, which provide accurate, fine-scale measurements. A larger hotplate sampling area increases the operating cost through higher power consumption. The work here was originally motivated by a desire to minimize DEID power and maximize measurement precision, although the calculations are applicable more generally to other disdrometers such as those described.**

- II.74-75 “In principle, the results should converge, although the Monte Carlo approach also facilitates the calculation here of the time required to measure the “first drop” in a precipitation event.” Too vague. Please clearly state whether your own results based on stochastic simulation techniques are consistent with those obtained by Joss and Waldvogel (1969). Also, there are many other simulation studies that are similar to the one you performed. Please cite them and explain how your own findings compare to theirs.

**Joss and Waldvogel (1969) is used as the comparison study because it is most similar to our work. Compared our results in II. 76-80 as follows**

**Under the assumption that raindrop size follows an exponential distribution, to measure a precipitation rate of  $R = 1$  mm/h to a precision of 10% within 95% confidence bounds, the required sample size is  $1.5 \text{ m}^2 \text{ s}$ , corresponding to a cross-sectional sampling area of**

**A = 250 cm<sup>2</sup> with a square width W = 15.8 cm for a nominal 60 s collection interval. The required square width W found in this work for the same parameters is 13 cm.**

II.82-83, "individual hydrometeor mass is calculated from conservation of energy, whereby the heat gained by the hydrometeor is equal to the heat lost by the hotplate when evaporating water" The way this sentence is formulated can be misleading. It gives the impression that you can infer the individual masses for each raindrop. However, as far as I understood it, you can only infer the total mass of water on the plate. This means that if there are multiple raindrops on the plate at the same time, you can't get the detail of each. Or did I miss something? Please clarify!

**The DEID obtains individual particle masses even if there are multiple hydrometeors on the plate at the same time.**

II.138-139: A sample of drops is generated from Eq. (5), where  $\Delta t = h/v$  is maximized for the value of  $v$  corresponds with the smallest droplet diameter Not clear. Please reformulate.

**The statement now reads**

**A sample of drops is generated from Eq. (5). To ensure that the drop with the smallest size  $D_{\text{mean}}$  could feasibly fall from the top to the bottom of the sample volume,  $\Delta t = h/v$  is maximized using the fallspeed of the minimum value of  $D_{\text{mean}}$ .**

II.139-140: Small drops may contribute negligibly to the precipitation rate but be the first detected, so the value of  $n(D)$  is taken from a gamma distribution rather than the exponential in Eq. (3) Not clear. Did you mean "can be detected first"? –

**The statement now reads**

**In general small drops contribute negligibly to calculations of precipitation rate (Smith et al., 2003) but due to their higher concentrations may nonetheless be the first detected. Accordingly, the functional form of  $n(D)$  is adjusted from the more simple exponential form described by Eq. (3) to a gamma distribution**

II.146-148: "Following the collection approach taken by Marshall et al. (1947), reproduction of a Marshall-Palmer size distribution is assumed to require collection of 100 drops. The time elapsed for the calculated incidence of 100 drops is  $t_{100}$  (Fig. 3). If fewer than 100 drops were obtained in  $N_{\text{coll}}$ , a new sample of drops is obtained from Eq. (5) with an increased value of  $\Delta t$ ." Marshall et al. (1947) never stated that you needed 100 drops to detect the onset of rain. Their study was primarily concerned with inferring the concentration and shape parameters of the DSD; a task for which you need a minimum number of samples (100) to get reasonably accurate results. I don't see how this connects to the detection of the onset of rain.

**Because the samples of drops were generated initially using a Marshall-Palmer distribution, we chose to compare the first drop to the 100<sup>th</sup> drop following the collection**

**approach in Marshall et al (1947). The first drop still represents the onset of rain. The 100th drop is included for comparison.**

- II.178-179: The Poisson assumption you use in the simulations is quite important, since in reality, the raindrops are not likely to be distributed uniformly in the volume and unlikely to arrive on the ground independently from each other. Especially at the beginning and end of intense convective events, you can have substantial temporal autocorrelation in the arrival times, which means you probably need a larger area and more drops to achieve the same precision. This is probably a minor issue compared with other sources of uncertainty. Still, I think it's worth discussing the potential errors that could result from a non-Poisson arrival process.

**Added the following discussion to Conclusions**

**The results suggest a larger plate may be required to meet a specified precision than those indicated by the Monte Carlo simulations that were performed. A possible explanation is the presence of non-Poissonian clustering that was revealed by two-point correlation function calculations, particularly during high wind and snow events.**
